# Supplementary material for: Preparation and Characterization of Jute Cellulose Crystals-Reinforced Poly(L-lactic acid) Biocomposite for Biomedical Applications
Source: Hindawi journal article supplement (doi:10.1155/2014/842147), 2014-01-01
Supplement: f1 [file 842147.f1.doc]

**Supporting Informations**

Figure S1. (a) TMA thermogram of pure PLA film

Figure S1. (b) TMA thermogram of composite

Fig34. TMA thermogram of pure PLA (a) and PLA composite film(b).

**
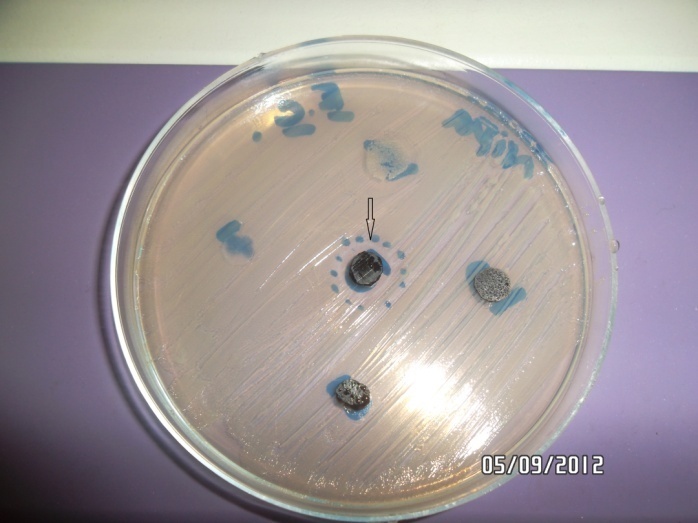
**

Fig. Negative Control (E. coli)

**
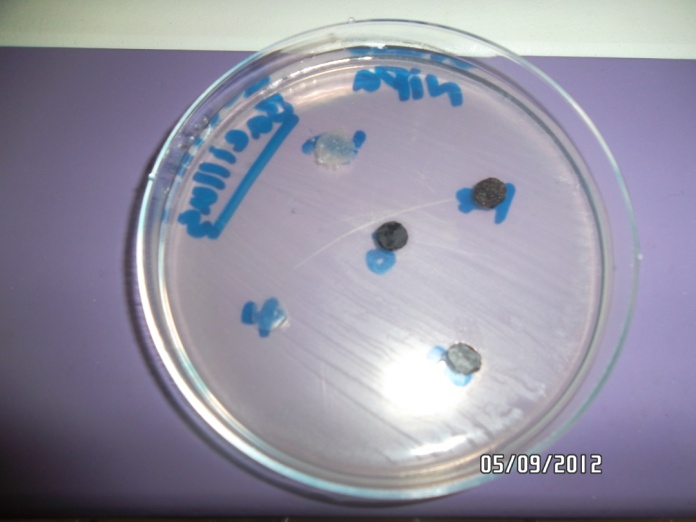
**

Fig. Negative Control (Bacillus Subtilis)

Fig S2. Antimicrobial sensitivity of pure PLA film and their composites
